# Supplementary material
Source: Elsevier journal article supplement (https://www.sciencedirect.com/science/article/pii/S0300289622005300)
Supplement: mmc1 [file S0300289622005300:mmc1.doc]

**Supplemental Online Material**

# Validation of IDSA/ATS guidelines for ICU admission in adults over 80 years old with community-acquired pneumonia

Catia Cilloniz1, Miquel Ferrer1, Juan M Pericàs2, 3, Leyre Serrano4,7, Raúl Méndez5, Albert Gabarrús1, Héctor José Peroni6, Luis Alberto Ruiz4, Rosario Menéndez5, Rafael Zalacain4, Antoni Torres1

**Methods**

**Data collection and evaluation**

Demographic variables, comorbidities, and physiological parameters were collected in the emergency department within 24 hours of admission. The Pneumonia Severity Index (PSI) at admission was calculated(1). During hospitalization, we recorded whether the patients had specific complications, including multilobar infiltration, pleural effusions, acute respiratory distress syndrome (ARDS), septic shock, and acute renal failure. The decisions for endotracheal intubation and initiation of invasive mechanical ventilation were made by attending physicians. Further details are reported elsewhere(2). All surviving patients were visited or contacted by telephone within 30 days of discharge.

**Microbiological diagnosis**

Microbiological diagnosis was performed on respiratory, blood and urine samples, which were collected before the initiation of empirical antibiotic therapy in the emergency department. Bacterial testing included blood and sputum cultures, as well as urine samples for *Streptococcus pneumoniae* and *Legionella pneumophila* antigen detection. Pleural fluid, tracheobronchial aspirates (TBAS) and bronchoalveolar lavage (BAL) fluid samples were collected, when available, for Gram and Ziehl-Neelsen staining. They were then processed for the detection of bacterial, fungal and mycobacterial pathogens. Blood samples for atypical pathogen serology were collected at admission and between the third and sixth week thereafter. Respiratory viruses were diagnosed by serology, immunofluorescence assay (IFA), and isolation in cell cultures between 2005 and 2007. However, from 2008 to 2019, diagnosis was performed with polymerase chain reaction (PCR) testing and/or cultures of nasopharyngeal swab samples. Two independent, nested and multiplex real-time PCR tests were used to detect human influenza viruses (A, B and C), respiratory syncytial virus, adenoviruses, parainfluenza viruses (1–4), coronaviruses (229E and OC43), enteroviruses and rhinoviruses (A, B and C).

Routine antimicrobial susceptibility testing included the Phoenix system (Becton Dickinson, MD, USA) and disk diffusion method or E-test. Results of susceptibility testing were interpreted according to EUCAST guidelines (http://www.eucast.org). Detailed criteria for etiological diagnosis are described elsewhere(3, 4).

**Statistical analysis**

We reported the number and percentage of patients as categorical variables, the median (first quartile [Q1]; third quartile [Q3]) as continuous variables with non-normal distributions, and the mean (standard deviation [SD]) as continuous variables with normal distributions. Categorical variables were compared using the chi-squared test or Fisher’s exact test, whereas continuous variables were compared using the t-test or nonparametric Mann-Whitney U test.

We also performed univariable and multivariable logistic regression analyses to identify variables predictive of ICU admission. Factors showing an association in the univariate analyses (p<0.10) were incorporated into the multivariable regression model including two predefined covariates (i.e., the period of admission and the center). Final variable selection was performed using the backward stepwise selection method (likelihood ratio) (pin<0.05, pout>0.10). Odds ratios (ORs) and their 95% confidence intervals (CIs) were calculated. Single collinearity was evaluated using the Pearson correlation (r), i.e., *r*>|±0.30|, while multicollinearity was examined by means of the variance inflation factor (VIF), i.e., VIF>10. We assessed the model’s performance by studying calibration and discrimination We evaluated calibration with the Hosmer-Lemeshow goodness-of-fit test. The discriminative ability refers to the score’s ability to distinguish patients admitted to the ICU from those admitted to the general ward. It was expressed as the area under the receiver operating characteristic curve (AUC) ranging between 0.5 (no discriminative ability) and 1.0 (perfect discriminative ability) (6). Possible overfitting and instability of the selection variables in the prediction model were assessed by internal validation using ordinary nonparametric bootstrapping with 1,000 bootstrap samples and bias-corrected, accelerated 95% Cis (7). We used the multiple imputation method (8) for missing data in the multivariable analysis (Supplementary Table 2).

To determine the predictive capacity of IDSA/ATS severe CAP criteria for ICU admission, we determined sensitivity, specificity and positive and negative likelihood ratios(9), along with 95% CIs. The coincidence between the predictive rule and clinical decision for ICU admission was assessed with the *kappa* coefficient of agreement(10).The univariate association of the predictive rule and severity criteria with ICU admission is expressed as the relative risk and a 95% CI.

The level of significance was set at 0.05 (two-tailed). and all analyses were performed using IBM SPSS Version 26.0 (IBM Corp., Armonk, NY, USA).

**Supplementary Table 1. Criteria for severe CAP according to the IDSA/ATS guidelines (adapted from (12))**

| **Minor criteria** |
| --- |
| - Respiratory rate ≥30 breaths/min * - PaO2/FiO2 ≤250 * - Multilobar infiltrates - Confusion-disorientation - Uremia (BUN level ≥20 mg/dL) - Leukopenia (WBC count <4x109/L) - Thrombocytopenia (platelet count <100x109/L) - Hypothermia (core temperature <36ºC) - Hypotension (SBP <90 mmHg) requiring aggressive fluid resuscitation |
| **Major criteria** |
| - Invasive mechanical ventilation - Septic shock with the need for vasopressors † |

Abbreviations: FiO2 indicates fraction of inspired oxygen; PaO2, partial pressure of arterial oxygen; BUN, blood urea nitrogen; WBC, white blood cell; SBP, systolic blood pressure. * The need for non-invasive ventilation can substitute either respiratory rate ≥30 breaths/min or PaO2/FiO2 ≤250. † Septic shock was defined as sepsis-induced hypotension persisting despite adequate fluid replacement alongside hypoperfusion abnormalities (12).

**Supplementary Table 2. Missing data map of variables including in the univariable and multivariable analyses to identify variables predictive of ICU admission**

|  | **N** | |
| --- | --- | --- |
| **Variable** | **Valid** | **Missing** |
| Sex | 2,006 | 0 |
| Antibiotic use in the last week | 1,954 | 52 |
| Chronic pulmonary disease | 1,981 | 25 |
| Chronic cardiovascular disease | 1,994 | 12 |
| Chronic renal disease | 1,997 | 9 |
| Chronic liver disease | 1,991 | 15 |
| Diabetes mellitus | 1,993 | 13 |
| Neurological disease | 1,982 | 24 |
| Confusion | 1,997 | 9 |
| Respiratory rate | 1,899 | 107 |
| Heart rate | 1,935 | 71 |
| Systolic blood pressure | 1,965 | 41 |
| Diastolic blood pressure | 1,961 | 45 |
| Temperature | 1,958 | 48 |
| Serum creatinine | 2,000 | 6 |
| C-reactive protein | 1,649 | 357 |
| White blood cell count | 2,002 | 4 |
| Lymphocytes | 1,099 | 907 |
| Glucose level | 1,980 | 26 |
| Platelet count | 1,313 | 693 |
| PaO2/FiO2 | 1,590 | 416 |
| Pleural effusion | 1,992 | 14 |
| Multilobar | 2,002 | 4 |
| Septic shock | 2,006 | 0 |

Abbreviations: FiO2 indicates fraction of inspired oxygen; PaO2, partial pressure of arterial oxygen.

**Supplementary Table 3. Etiology of microorganisms by site of care**

| **Variable** | **Patients not in the ICU**  **(N = 1,802)** | **Patients in the ICU**  **(N = 204)** | **P-value** |
| --- | --- | --- | --- |
| Patients with defined etiology, n (%) | 592 (33) | 104 (51) | **<0.001** |
| *Streptococcus pneumoniae* | 313 (53) | 60 (58) | 0.363 |
| Respiratory virus | 70 (12) | 7 (7) | 0.127 |
| *Legionella pneumophila* | 28 (5) | 6 (6) | 0.650 |
| *Haemophilus influenzae* | 24 (4) | 4 (4) | >0.999 |
| Atypical bacterial | 38 (6) | 3 (3) | 0.158 |
| *Coxiella burnetii* | 12 (2) | 1 (1) | 0.704 |
| *Mycoplasma pneumoniae* | 15 (3) | 0 (0) | 0.145 |
| *Chlamydophila pneumoniae* | 11 (2) | 2 (2) | >0.999 |
| *Pseudomonas aeruginosa* | 11 (2) | 0 (0) | 0.385 |
| *Staphylococcus aureus* | 12 (2) | 5 (5) | 0.156 |
| GNEB | 11 (2) | 1 (1) | >0.999 |
| *Escherichia coli* | 11 (2) | 1 (1) | >0.999 |
| *Moraxella catarrhalis* | 3 (1) | 0 (0) | >0.999 |
| Other | 20 (3) | 4 (4) | 0.771 |
| Polymicrobial | 61 (10) | 14 (13) | 0.338 |
| PES pathogens | 46 (8) | 9 (9) | 0.758 |

Abbreviations: ICU indicates intensive care unit; GNEB, gram-negative enteric bacteria; PES, *Pseudomonas aeruginosa*, Enterobacteriaceae ESBL+ and *Staphylococcus aureus* methicillin resistant. The percentages of pathogens are related to the number of patients with etiologic diagnosis in each group (592 in the ward group and 104 in the ICU group). P-values marked in bold indicate numbers that are statistically significant within the 95% confidence limit.

**Supplementary Table 4. Internal validation of the prediction model for ICU admission using nonparametric bootstrap technique**

| **Variable** | **Original** | **Bias** | **SE** | **95% BCa CI** |
| --- | --- | --- | --- | --- |
| Male sex | 0.466 | 0.007 | 0.181 | 0.102 to 0.825 |
| Neurological disease | -0.975 | -0.014 | 0.267 | -1.515 to -0.521 |
| Respiratory rate ≥30 breaths/min | 1.022 | 0.000 | 0.190 | 0.647 to 1.406 |
| Systolic blood pressure <90 mmHg | 0.759 | -0.024 | 0.320 | 0.114 to 1.319 |
| Serum creatinine ≥1.5 mg/dL | 0.409 | -0.005 | 0.182 | 0.038 to 0.758 |
| Glucose level ≥200 mg/dL | 0.777 | -0.005 | 0.196 | 0.398 to 1.132 |
| PaO2/FiO2 <250 | 0.836 | 0.013 | 0.182 | 0.452 to 1.232 |
| Pleural effusion | 0.581 | -0.008 | 0.234 | 0.137 to 1.007 |
| Multilobar | 0.956 | 0.015 | 0.194 | 0.557 to 1.404 |
| Septic shock | 2.226 | 0.050 | 0.295 | 1.678 to 2.954 |

Abbreviations: BCa indicates adjusted bootstrap; CI, confidence interval; FiO2, fraction of inspired oxygen; PaO2, partial pressure of arterial oxygen; SE, standard error.

**Supplementary Table 5. Characteristics of the study population by severe CAP**

| **Variable** | **Patients with non-severe CAP**  **(N = 1, 487)** | **Patients with severe CAP**  **(N =519)** | **P-value** |
| --- | --- | --- | --- |
| Age, years, median (Q1; Q3) | 84 (82; 87) | 85 (82; 89) | **<0.001** |
| Male sex, n (%) | 854 (57) | 333 (64) | **0.007** |
| Current smoker, n (%) | 86 (6) | 35 (7) | 0.398 |
| Current alcohol consumer, n (%) | 85 (6) | 35 (7) | 0.344 |
| Previous antibiotic, n (%) | 307 (21) | 111 (22) | 0.535 |
| Influenza vaccine, n (%) | 871 (68) | 217 (60) | **0.008** |
| Pneumococcal vaccine, n (%) | 300 (23) | 85 (23) | 0.940 |
| Previous inhaled corticosteroids, n (%) | 234 (22) | 74 (16) | **0.008** |
| Previous systemic corticosteroids, n (%) | 43 (5) | 15 (4) | 0.776 |
| Previous episode of pneumonia (last year), n (%) | 197 (19) | 81 (19) | 0.864 |
| Comorbidities, n (%) a | 1,133 (76) | 431 (83) | **0.001** |
| Chronic respiratory disease | 605 (41) | 219 (43) | 0.422 |
| Chronic cardiovascular disease | 404 (27) | 152 (30) | 0.322 |
| Diabetes mellitus | 353 (24) | 149 (29) | **0.020** |
| Chronic neurological disease | 254 (17) | 144 (28) | **<0.001** |
| Chronic renal disease | 155 (10) | 112 (22) | **<0.001** |
| Chronic liver disease | 33 (2) | 9 (2) | 0.507 |
| Nursing-home, n (%) | 96 (6) | 58 (11) | **<0.001** |
| Confusion, n (%) | 165 (11) | 264 (51) | **<0.001** |
| Respiratory rate, breaths/min, median (Q1; Q3) | 22 (18; 28) | 32 (24; 36) | **<0.001** |
| Heart rate, beats/min, median (Q1; Q3) | 92 (80; 104) | 97 (83; 110) | **<0.001** |
| Systolic blood pressure, mmHg, median (Q1; Q3) | 137 (120; 155) | 124 (100; 148.5) | **<0.001** |
| Diastolic blood pressure, mmHg, median (Q1; Q3) | 70 (62; 80) | 66.5 (57; 80) | **<0.001** |
| Temperature, ºC, median (Q1; Q3) | 37.3 (36.7; 38.0) | 37.1 (36.2; 38.0) | **<0.001** |
| Serum creatinine, mg/dL, median (Q1; Q3) | 1.1 (0.9; 1.4) | 1.6 (1.2; 2.1) | **<0.001** |
| C-reactive protein, mg/dL, median (Q1; Q3) | 15.4 (7.7; 25.0) | 19.3 (8.4; 28.8) | **0.002** |
| White blood cell count, cells/mm3, median (Q1; Q3) | 12,900 (9,400; 17,200) | 12,750 (8,400; 18,570) | 0.429 |
| Lymphocytes, cells/mm3, median (Q1; Q3) | 950 (610; 1,365) | 795 (374.5; 1,337) | **<0.001** |
| Glucose level, mg/dL, median (Q1; Q3) | 132 (111; 168) | 141 (111; 199) | **0.003** |
| Platelet count, platelets/mm3, median (Q1; Q3) | 263 (192; 1,250) | 236 (167; 309) | **<0.001** |
| PaO2/FiO2, median (Q1; Q3) | 286 (257; 319) | 233 (200; 267) | **<0.001** |
| PSI score, median (Q1; Q3) | 103 (91; 121) | 145 (130; 162) | **<0.001** |
| Severe CAP, n (%) | - | 519 (100) | - |
| Only ≥1 major criterion | - | 58 (11) | - |
| ≥1 major criterion and ≥3 minor criteria | - | 84 (16) | - |
| Only ≥3 minor criteria | - | 377 (73) | - |
| Bacteremia, n (%) b | 85 (8) | 66 (19) | **<0.001** |
| Pleural effusion, n (%) | 161 (11) | 68 (13) | 0.117 |
| Multilobar, n (%) | 199 (13) | 263 (51) | **<0.001** |
| ARDS, n (%) | 16 (1) | 63 (13) | **<0.001** |
| Acute renal failure, n (%) | 332 (24) | 341 (67) | **<0.001** |
| Septic shock, n (%) | 0 (0) | 102 (20) | **<0.001** |
| Appropriate empiric treatment, n (%) | 1,261 (92) | 383 (90) | 0.104 |
| Length of hospital stay, days, median (Q1; Q3) | 6 (5; 9) | 9 (6; 15) | **<0.001** |
| Invasive mechanical ventilation, n (%) c | 0 (0) | 70 (13) | **<0.001** |
| ICU admission, n (%) | 50 (3) | 154 (30) | **<0.001** |
| 30-day mortality, n (%) d | 53 (4) | 128 (25) | **<0.001** |

Abbreviations: ARDS indicates acute respiratory distress syndrome; CAP, community-acquired pneumonia; FiO2, fraction of inspired oxygen; ICU, intensive care unit; PaO2, partial pressure of arterial oxygen; PSI, pneumonia severity index; Q1, first quartile; Q3, third quartile. Percentages calculated on non-missing data. P-values marked in bold indicate numbers that they are statistically significant within the 95% confidence limit. a Possibly >1 comorbidity. b Calculated only for patients with blood samples (1,127 in the non-severe CAP group and 355 in the severe CAP group). c Patients who initially received non-invasive ventilation but subsequently needed intubation were included in the invasive mechanical ventilation group. d Calculated only for patients with 30-day follow-up (1,461 in the non-severe CAP group and 517 in the severe CAP group).

**Supplementary Table 6. Etiology of microorganisms by severe CAP**

| **Variable** | **Patients with non-severe CAP**  **(N = 1, 487)** | **Patients with severe CAP**  **(N =519)** | **P-value** |
| --- | --- | --- | --- |
| Patients with defined etiology, n (%) | 505 (34) | 191 (37) | 0.242 |
| *Streptococcus pneumoniae* | 278 (55) | 95 (50) | 0.210 |
| Respiratory virus | 62 (12) | 15 (8) | 0.097 |
| *Legionella pneumophila* | 25 (5) | 9 (5) | 0.896 |
| *Haemophilus influenzae* | 19 (4) | 9 (5) | 0.569 |
| Atypical bacterial | 36 (7) | 5 (3) | **0.024** |
| *Coxiella burnetii* | 11 (2) | 2 (1) | 0.531 |
| *Mycoplasma pneumoniae* | 13 (3) | 2 (1) | 0.378 |
| *Chlamydophila pneumoniae* | 12 (2) | 1 (1) | 0.128 |
| *Pseudomonas aeruginosa* | 3 (1) | 8 (4) | **0.002** |
| *Staphylococcus aureus* | 11 (2) | 6 (3) | 0.424 |
| GNEB | 3 (1) | 9 (5) | **0.001** |
| *Escherichia coli* | 3 (1) | 9 (5) | **0.001** |
| *Moraxella catarrhalis* | 3 (1) | 0 (0) | 0.566 |
| Other | 17 (4) | 7 (4) | 0.847 |
| Polymicrobial | 47 (9) | 28 (15) | **0.042** |
| PES pathogens | 21 (4) | 34 (18) | **<0.001** |

Abbreviations: CAP indicates community-acquired pneumonia; GNEB, gram-negative enteric bacteria; PES, *Pseudomonas aeruginosa*, Enterobacteriaceae ESBL+ and *Staphylococcus aureus* methicillin resistant. Percentages of pathogens are related to the number of patients with etiological diagnosis in each group (505 in the non-severe CAP group and 191 in the severe CAP group). P-values marked in bold indicate numbers that are statistically significant within the 95% confidence limit.

**References**

1. Fine MJ, Auble TE, Yealy DM, Hanusa BH, Weissfeld LA, Singer DE, Coley CM, Marrie TJ, Kapoor WN. A prediction rule to identify low-risk patients with community-acquired pneumonia. *N Engl J Med* 1997;336:243–250.

2. Cilloniz C, Ferrer M, Liapikou A, Garcia-Vidal C, Gabarrus A, Ceccato A, Puig de La Bellacasa J, Blasi F, Torres A. Acute respiratory distress syndrome in mechanically ventilated patients with community-acquired pneumonia. *Eur Respir J* 2018;51:1702215.

3. Cillóniz C, Polverino E, Ewig S, Aliberti S, Gabarrús A, Menéndez R, Mensa J, Blasi F, Torres A. Impact of age and comorbidity on cause and outcome in community-acquired pneumonia. *Chest* 2013;144:999–1007.

4. Cillóniz C, Ewig S, Polverino E, Marcos MA, Esquinas C, Gabarrús A, Mensa J, Torres A. Microbial aetiology of community-acquired pneumonia and its relation to severity. *Thorax* 2011;66:340–346.

5. D. W. Hosmer and S. Lemeshow, Wiley. *Applied logistic regression*. 1989.

6. Altman DG, Bland JM. Diagnostic tests 3: receiver operating characteristic plots. *BMJ* 1994;309:188.

7. Bradley Efron, R.J. Tibshirani. *An Introduction to the Bootstrap*. 1994.

8. Sterne JAC, White IR, Carlin JB, Spratt M, Royston P, Kenward MG, Wood AM, Carpenter JR. Multiple imputation for missing data in epidemiological and clinical research: potential and pitfalls. *BMJ* 2009;338:b2393.

9. Altman DG, Bland JM. Diagnostic tests. 1: Sensitivity and specificity. *BMJ* 1994;308:1552.

10. McHugh ML. Interrater reliability: the kappa statistic. *Biochem Med (Zagreb)* 2012;22:276–282.
